# Supplementary material
Source: PubMed Central journal article supplement (PMC3948799)
Supplement: 0fb9baa72e55cc2001fbd1627d5d9151_genetics.113.158980-7.pdf [file 0fb9baa72e55cc2001fbd1627d5d9151_genetics.113.158980-7.pdf]

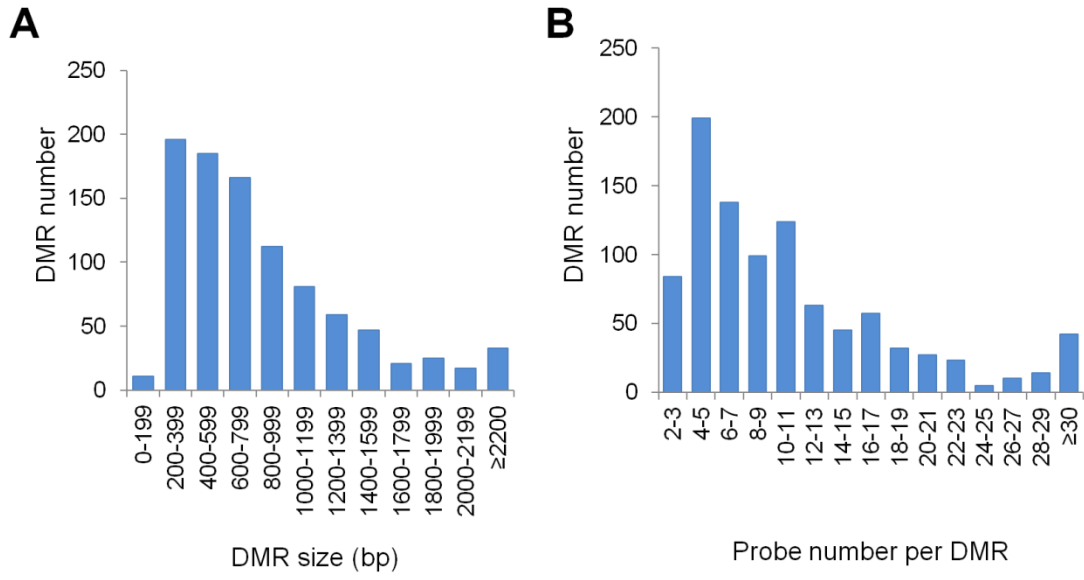

**Figure S2** Characteristics of DMRs used in this study. (A) Size distribution of 962 DMRs used in this study. (B) Distribution of probe numbers per DMR. Both Original and New probes were included.
