# Supplementary material
Source: PubMed Central journal article supplement (PMC3948799)
Supplement: 1cf28dbbdf1df44faa306525bf33b6a0_genetics.113.158980-2.pdf [file 1cf28dbbdf1df44faa306525bf33b6a0_genetics.113.158980-2.pdf]

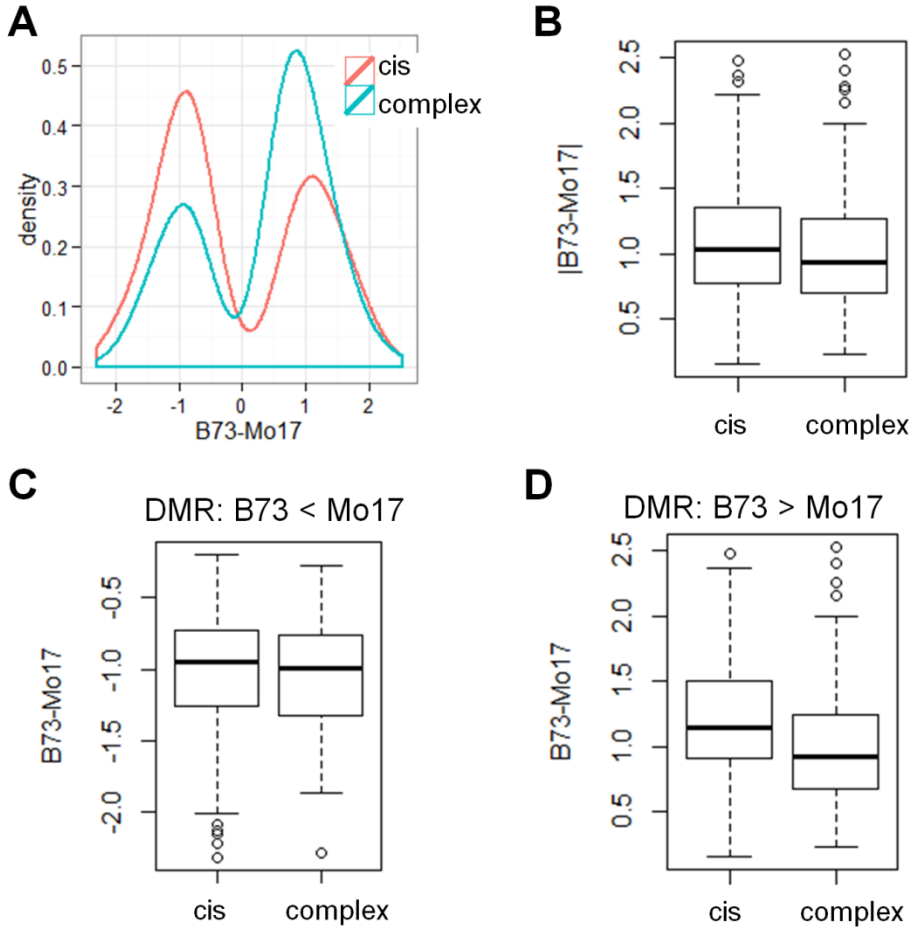

**Figure S4** Comparison of parental difference between cis DMR and complex DMR. (A) Distribution of parental difference for DMRs showing cis or complex inheritance pattern. (B) Boxplot showing the absolute value of parental difference for cis and complex DMR. (C-D) Comparison of parental methylation difference between cis and complex DMR. In C, only DMRs with Mo17 having higher methylation level than B73 were included. In D, only DMRs with B73 having higher methylation level than Mo17 were included.
