# Supplementary material
Source: PubMed Central journal article supplement (PMC3948799)
Supplement: 7dd0c084e558a91fe3528c56eb864c79_genetics.113.158980-11.pdf [file 7dd0c084e558a91fe3528c56eb864c79_genetics.113.158980-11.pdf]

**Table S1 Primers used in this study**

| Name     | Forward sequence         | Reverse sequence           |
|----------|--------------------------|----------------------------|
| DMR_0404 | ACCCTGGTGGCATTGTTCTAGT   | TCCCCTCTCTTCAAGCAGAAAC     |
| DMR_0858 | ATCGCCCTAGGACAGCTAACAG   | ACTCCCTTCGGTTCTCCCTATC     |
| DMR_0944 | GGACTCCTAGGGGAGAGGGATA   | TAGATCTCGGGTCAGGAGGAAG     |
| DMR_0990 | ACTCTCTGCGACGTTTCTCAGTT  | ACGTCTTCAACCAAACCTCTCTG    |
| DMR_1507 | TGTCTCGGTGATCATGGTGT     | TGAGACATACTACTAGCACACTGCTG |
| DMR_1943 | CCGACCAACAAGTGTAAGTGA    | AGTCTCGAGAAGGTTGCCATAG     |
| DMR_2983 | TTTGAAAGCGAGGAACAAAAT    | CCCGATTAAATTCCGGTGATAA     |
| DMR_3086 | TAGGTTAGGGTTTGTGCGGTGCT  | TATCTTTTCATGCCTTGCTGGA     |
| DMR_3180 | AAGAGAAAAGGTTTCCCTGAGC   | GTGGAAGAGTACCATCTGGTTTG    |
| DMR_3318 | TGCACTCGAACAGTTAGAAATCAG | GCAGAACCTGGAAACAGAAAAA     |
| DMR_4660 | GTTGTAGCGTAGCAGCATCTTCA  | TTCTCTATCCTTGCACCTTCTCTG   |
| DMR_4919 | CGATCAACCGTGTCTGTTTC     | ATGAAGGGGGATCAAGCTGAAG     |
| DMR_4990 | GCTACGTAACGTGCTGCCTGT    | ATCGAGGTTGGAGGTCTCATA      |
| DMR_5281 | TGCCTGGTGATTGATTCCAC     | ATCCACCTGCTACACCGACTTC     |
| DMR_5351 | CATTTCTATGCTCGGCTACATGA  | GAACGGTCATGGTGAATTGCT      |
| DMR_5359 | ATGCAGTGAGCTCTAGGGTTACG  | CAAATAGCACAACCGCTTTCTCT    |
| DMR_5403 | AAGAATTAAGTTGTGGGTGTGC   | TCGTATGTGCCATTTGGTAAGG     |
| DMR_5532 | ACGAGTCCAATTCCATGTTCTCT  | TCATCGAACTTCAACTGCCCTA     |
| DMR_6578 | AACGCAACAGCACAACATTAGG   | TGTTTTGACAAGTGCATCGAGA     |
| DMR_6652 | GTTTACAGAGGCTGAGGGCAAG   | CTCCCTATCGAAGCACCCTG       |
| DMR_6928 | GTTAAGGGGGCAAGAAGAAAGA   | ACCCATGTCTACATCACGAACC     |
| DMR_7139 | CCACTCGGCATCTAGTCAACAC   | GTAGAAACGAGAGCCTGCGACT     |
| DMR_8050 | TCTTCAACGCTGACTTCTTTGC   | GTGTGCTGAAGGTGATTTGGAG     |
| DMR_8181 | TACAGCACCGTAGATTGCCAGT   | GCGGAGTTTTGGATAACTTTGG     |
| DMR_8420 | AATTTCTCGTCGGAGATCGAAG   | GACTTGACCATGCCGACATTT      |
| DMR_9359 | TAGCCGCAGATCAAGAATTCAA   | CGTTCCTCATTGGGAGTACACA     |
| DMR_9470 | ACGGCGGACCTAACTATACACC   | CCAATCGTGTGTCGGTTATTCT     |
