# Supplementary material
Source: PubMed Central journal article supplement (PMC3948799)
Supplement: 7082885077363a0715a02abd4aef2756_genetics.113.158980-8.pdf [file 7082885077363a0715a02abd4aef2756_genetics.113.158980-8.pdf]

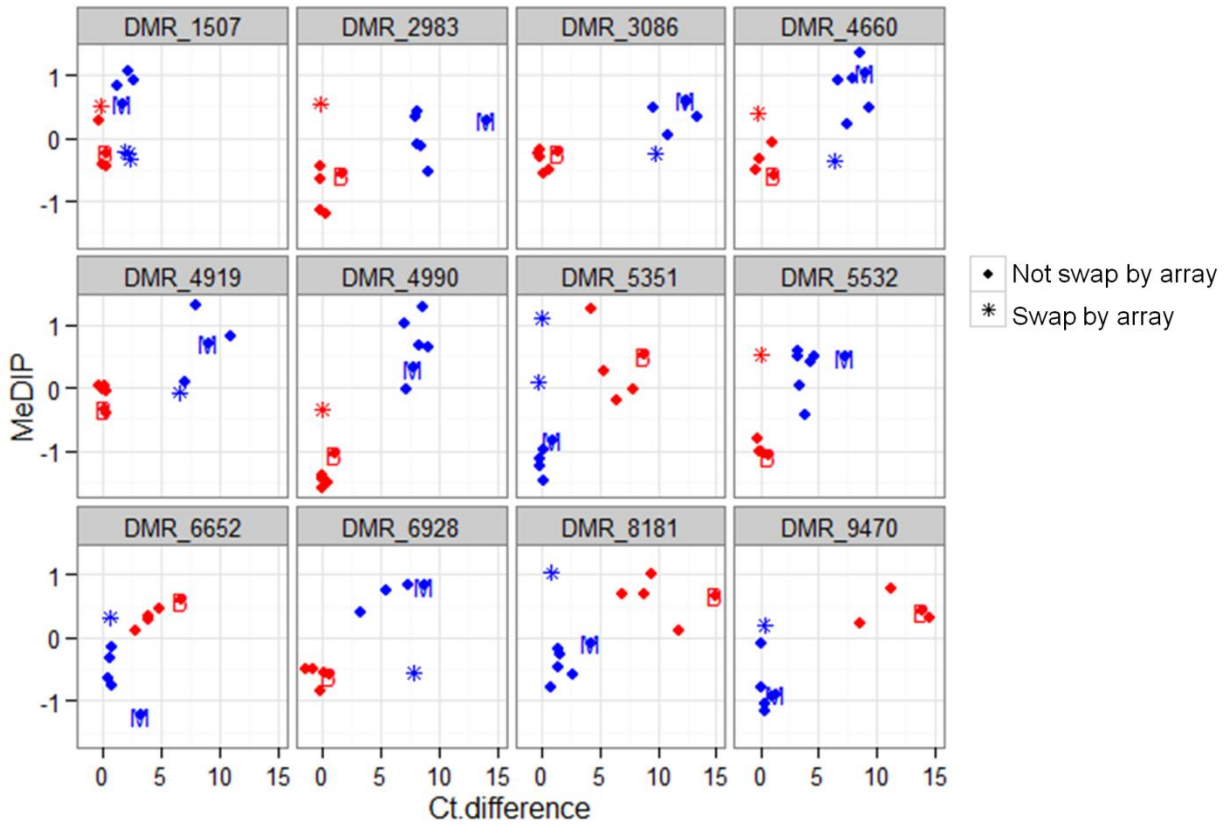

**Figure S6** qPCR validation of DMR inheritance pattern and swaps (i.e. unstable inheritance relative to genotype). For each panel, the x axis is methylation level based on qPCR, big numbers represent higher methylation level; the y axis is methylation level based on array, with positive and negative values representing higher and lower methylation, respectively. The dot/star within each panel represent either B73 inbred (B) or Mo17 inbred (M), or one NIL, with B73-like and Mo17-like lines colored as red or blue, respectively. For all the 12 DMRs tested, the inheritance pattern (cis) was confirmed, while the swaps was only supported by array and not by qPCR.
