# Supplementary material
Source: PubMed Central journal article supplement (PMC3948799)
Supplement: c4db7d6b6144f6f4d43b65f4cc9183a3_genetics.113.158980-6.pdf [file c4db7d6b6144f6f4d43b65f4cc9183a3_genetics.113.158980-6.pdf]

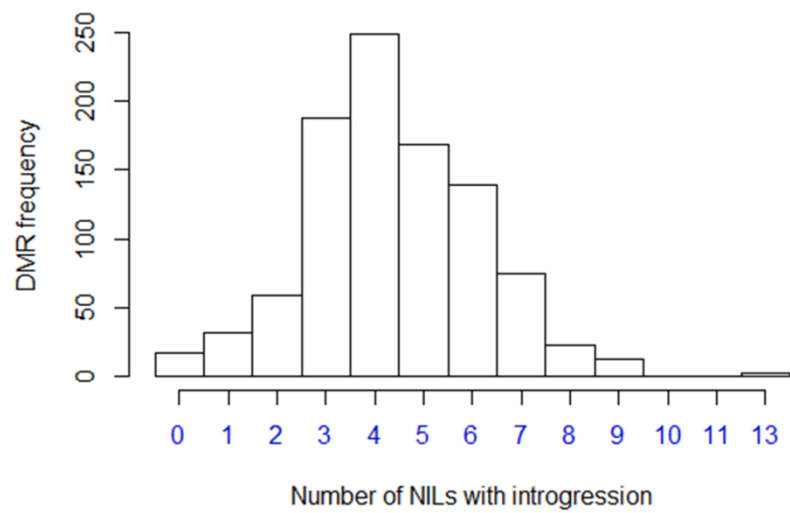

**Figure S3** Distribution of informative NIL number per DMR. Note: the majority of DMRs have 3-6 NILs with introgressions. All 962 significant DMRs between B73 and Mo17 were included.
